# Supplementary material for: Sparsity-Based Pixel Super Resolution for Lens-Free Digital In-line Holography
Source: Sci Rep. 2016 Apr 21;6:24681. doi: 10.1038/srep24681 (PMC4838824; doi:10.1038/srep24681)
Supplement: Supplementary Information [file srep24681-s1.pdf]

# SPARSITY-BASED PIXEL SUPER RESOLUTION FOR LENS-FREE DIGITAL IN-LINE HOLOGRAPHY

Jun Song<sup>1,2¶</sup>, Christine Leon Swisher<sup>1,3¶</sup>, Hyungsoon Im<sup>1,3</sup>, Sangmoo Jeong<sup>1,3</sup>, Divya Pathania<sup>1,3</sup>, Yoshiko Iwamoto<sup>1</sup>, Misha Pivovarov<sup>1,3</sup>, Ralph Weissleder<sup>1,3,4</sup>, Hakho Lee<sup>1,3\*</sup>

<sup>1</sup> Center for Systems Biology, Massachusetts General Hospital, Boston, Massachusetts, United States of America

<sup>2</sup> School of Engineering and Applied Sciences, Harvard University, Cambridge, Massachusetts, United States of America.

<sup>3</sup> Department of Radiology, Massachusetts General Hospital, Boston, Massachusetts, United States of America

<sup>4</sup> Department of Systems Biology, Harvard Medical School, Boston, Massachusetts, United States of America

Corresponding author:

H. Lee, PhD

[hlee@mgh.harvard.edu](mailto:hlee@mgh.harvard.edu)

¶ These authors contributed equally to this work.

## SUPPLEMENTARY FIGURES

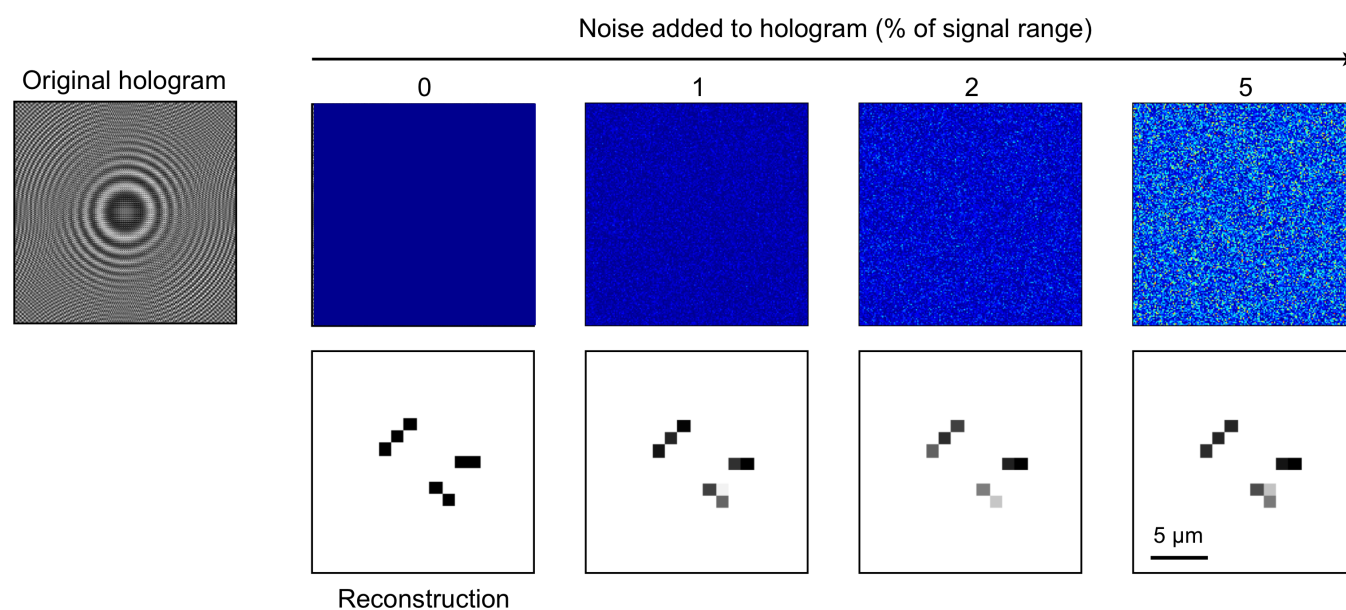

**Fig. S1. Noise test of the sparsity algorithm.** Gaussian noise was added to the original hologram input (left) before the sparsity-based reconstruction. The noise level was varied in proportional to the signal range in the hologram. In this example, the sparsity algorithm tolerated up to 5% of the noise level.

USAF1951 phantom

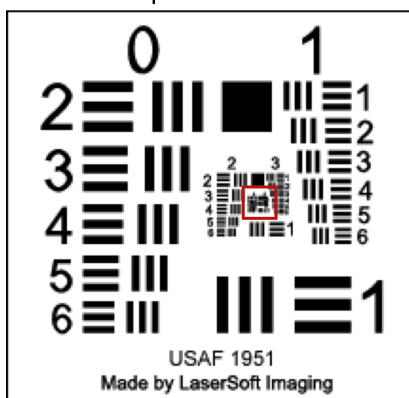

Diffraction-based reconstruction

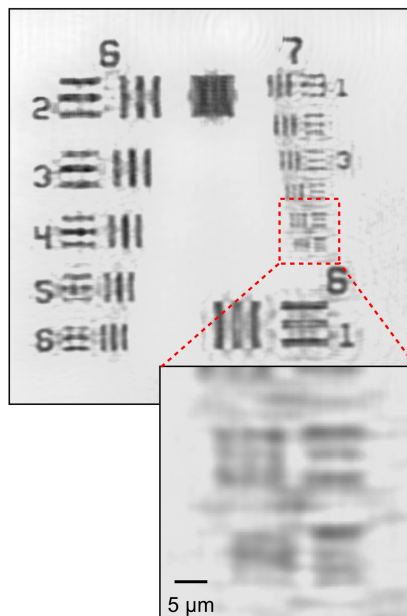

Sparsity-based reconstruction

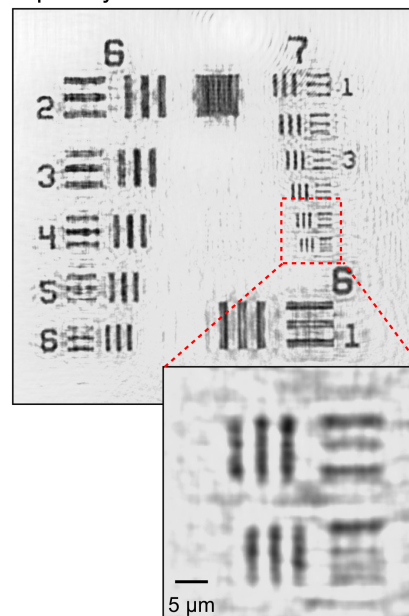

**Fig. S2. Reconstruction of an USAF1951 phantom.** The test patterns in the red solid box (left) were imaged by the LDIH system, and reconstructed by the diffraction-based (middle) and the sparsity-based (right) algorithms. The sparsity method showed higher resolving power than the diffraction method. The sparsity method resolved all patterns including the smallest feature with the line width of 2.1  $\mu$ m.

Reconstructed image in the full field-of-view

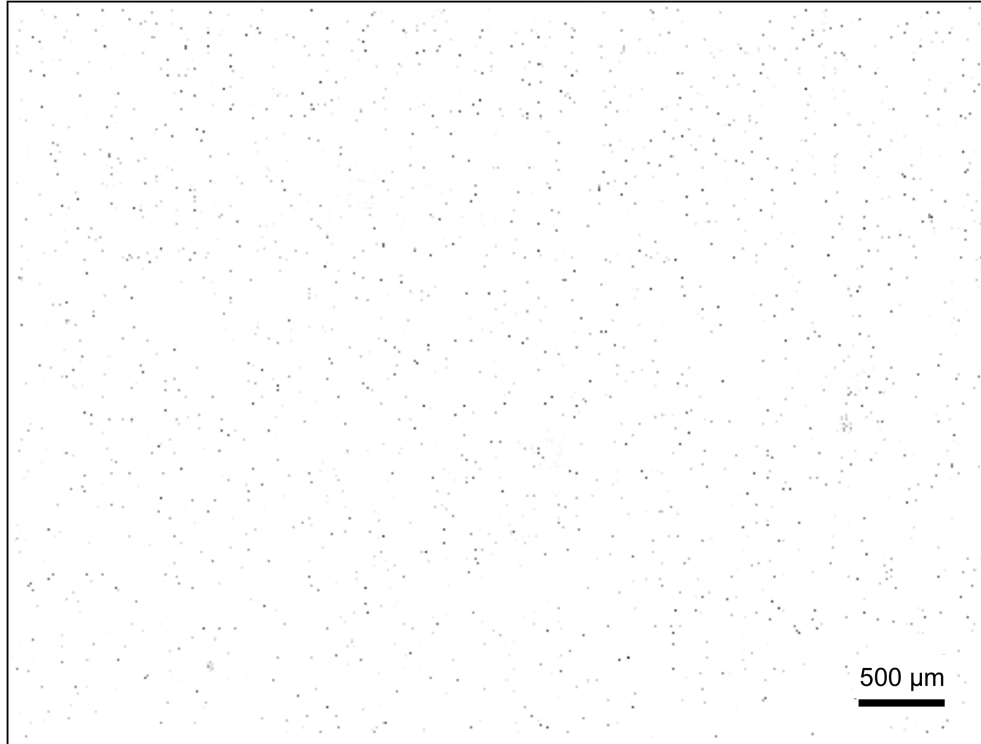

Measured hologram

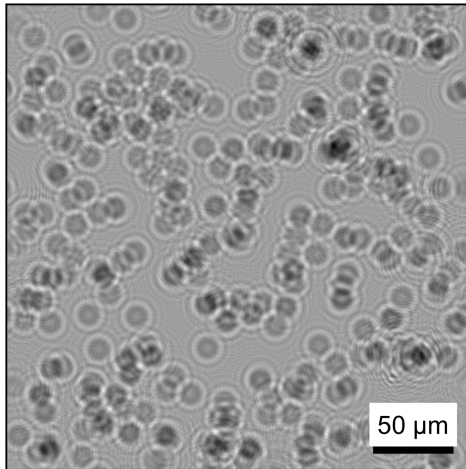

Sparsity-based reconstruction

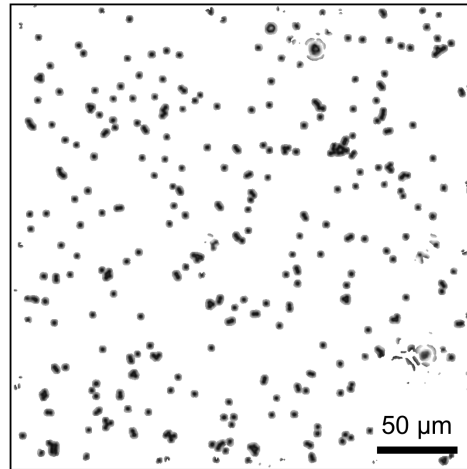

**Fig. S3. Wide field-of-view imaging.** With its unit magnification, the LDIH supports wide field-of-view imaging. We reconstructed  $>10^6$  microbeads in a single view of  $6\text{ mm}^2$  (top). The sparsity algorithm was applied to reconstruct a high resolution object image (bottom).
